# Supplementary material for: Enzymatic extraction of pectic oligosaccharides from finger citron (Citrus medica L. var. sarcodactylis Swingle) pomace with antioxidant potential
Source: Royal Society of Chemistry journal article supplement (doi:10.1039/d1fo01576a), 2021-01-01
Supplement: d1fo01576a1.pdf [file d1fo01576a1.pdf]

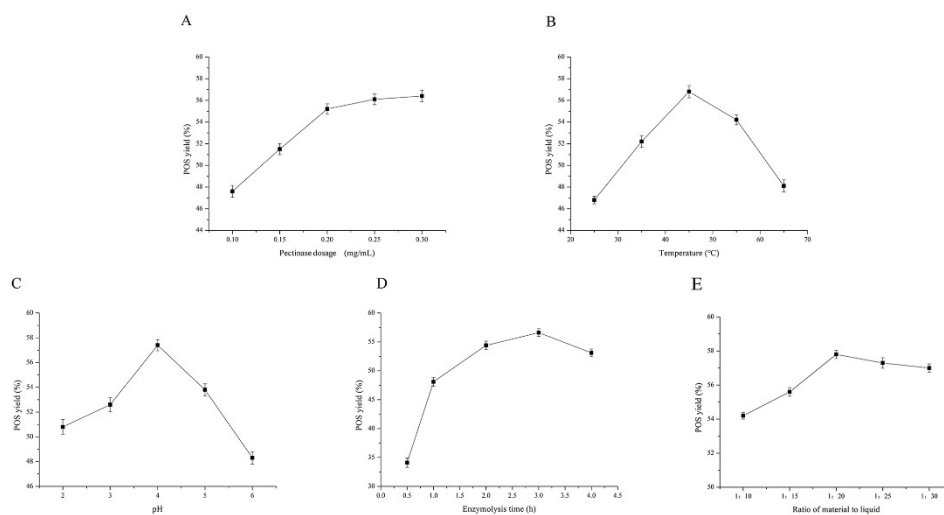

**Fig. S1** Effects of different (A) pectinase usage, (B) temperatures, (C) pH, (D) enzymolysis time and (E) ratio of material to liquid on the extraction yield of POS.

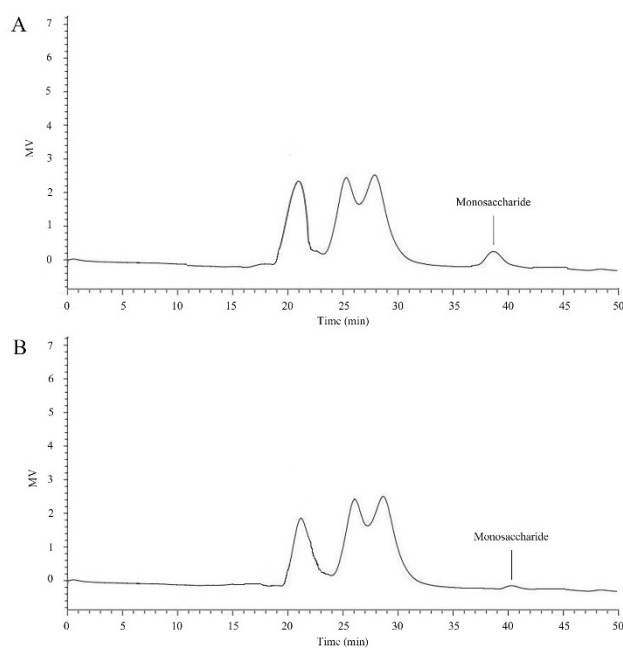

**Fig. S2** HPGPC of POS before yeast fermentation (A) and after yeast fermentation (B)

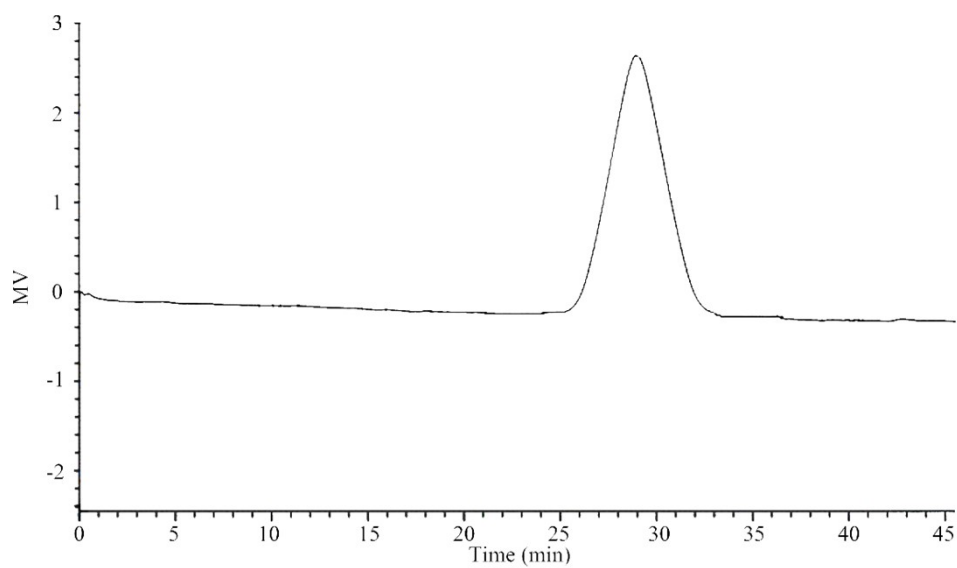

**Fig. S3** HPGPC of FCPOS-1

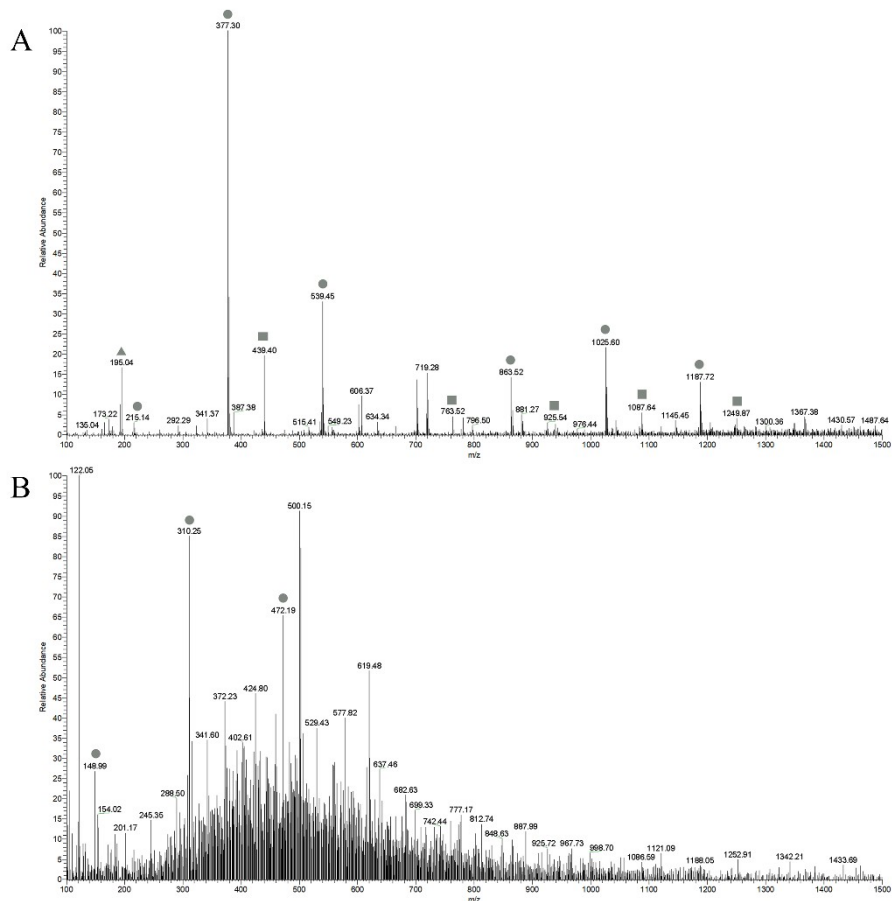

**Fig. S4** ESI-MS spectrum of FCPOS-1 confirmed the existence of GalA, mannose and galactose (A) and the existence of arabinose (B)
